# Supplementary material for: Modification of ZnO gas-diffusion-electrodes for enhanced electrochemical CO2 reduction: optimization of operational conditions and mechanism investigation
Source: Royal Society of Chemistry journal article supplement (doi:10.1039/d4ma00750f), 2024-01-01
Supplement: d4ma00750f1.pdf [file d4ma00750f1.pdf]

**Modification of ZnO gas-diffusion-electrodes for enhanced electrochemical CO<sub>2</sub> reduction: Optimization of operational conditions and mechanism investigation.**

Gonçalves J. Marrenjo,<sup>1,2</sup> Gelson T. S. T. da Silva,<sup>3</sup> Rodrigo A. Muñoz,<sup>1</sup> Lucia H. Mascaro,<sup>3</sup> Osmando F. Lopes<sup>1,\*</sup>

<sup>1</sup> *Institute of Chemistry, Federal University of Uberlândia, Avenida João Naves de Avila, 2121, 34800-902 Uberlândia, Minas Gerais, Brazil*

<sup>2</sup> *Save University, Department of Natural Sciences, FPLM Avenida FPLM, 111, +25829371110, Massinga, Inhambane, Mozambique.*

<sup>3</sup> *Interdisciplinary Laboratory of Electrochemistry and Ceramics, Department of Chemistry, Federal University of Sao Carlos, São Carlos, São Paulo, 13565-905, Brazil*

## EXPERIMENTAL SECTION

### Characterization

The thermogravimetric analysis (TGA) was performed using a TA Instruments Shimadzu DTG-60H thermogravimetric analyzer in a temperature range of 20 to 600°C under a synthetic air flow, applying a heating rate of 10°C/minute. The crystallinity of the samples was analyzed by X-ray diffraction (XRD) using Cu K $\alpha$  radiation ( $\lambda=1.5406\text{\AA}$ ) in the  $2\theta$  range of 10 to 70° with a Shimadzu XRD-6000 diffractometer. Raman spectra were obtained using a Confocal Raman spectrometer, LabRAM HR Evolution model – HORIBA, with a CCD Sensor (OSD Sincerity) customized with 4 laser lines, coupled with HORIBA Scientific’s LabSpec software. A 532nm excitation wavelength was applied, generating a power of 50mW, measured with a power meter as 78mW. Infrared spectra (FTIR) of the materials were acquired using a Perkin Elmer FTIR Frontier Single Range – MIR spectrophotometer in the range of 4000 to 220  $\text{cm}^{-1}$  with 9 scans and a resolution of 4  $\text{cm}^{-1}$ . Measurements were performed using an Attenuated Total Reflectance (ATR) accessory with a diamond crystal. The morphologies of the samples were examined by scanning electron microscopy (SEM) using a Tescan VEGA 3 LMU microscope equipped with a thermionic emission electron source, coupled with a microanalysis detector for elemental identification.

**The calculation of crystal size was performed using the Scherrer Equation. (S1).**

$$D_{hkl} = \frac{KY}{\beta \cos(\theta)} \quad \text{Eq. (S1).}$$

Where D is the crystal size, Cu K $\alpha$  (1.54  $\text{\AA}$ ) is the wavelength of the radiation,  $\beta$  is the full width at half maximum (FWHM) in radians, k is the shape factor (0.9), and  $\theta$  is the scattering angle.

The faradaic efficiencies of CO and H<sub>2</sub> were calculated using Equation (S2)

$$FE = \frac{(2nF \times 100\%)}{Q} \quad \text{Eq.(S2)}$$

2 is relates with the number of electrons involved in the electrochemical reduction of CO<sub>2</sub> to CO or H<sub>2</sub>, **n**-is the number of moles of products, **F**-is 96.485 C·mol<sup>-1</sup> (Faraday's constant), and **Q**-is the total transferred charge.

**Table S1.** The crystallite size of ZnO treated at different temperatures and modified with monoethanolamine was determined using the Scherrer equation.

| Samples       | Xc       | Wc      | D (nm) | Crystalline phase |
|---------------|----------|---------|--------|-------------------|
| ZnO-100       | 36.27758 | 0.20039 | 41.722 | ZnO               |
| ZnO-150       | 36.27712 | 0.20015 | 41.772 | ZnO               |
| ZnO/Met-31 μL | 36.27769 | 0.20037 | 41.726 | ZnO               |

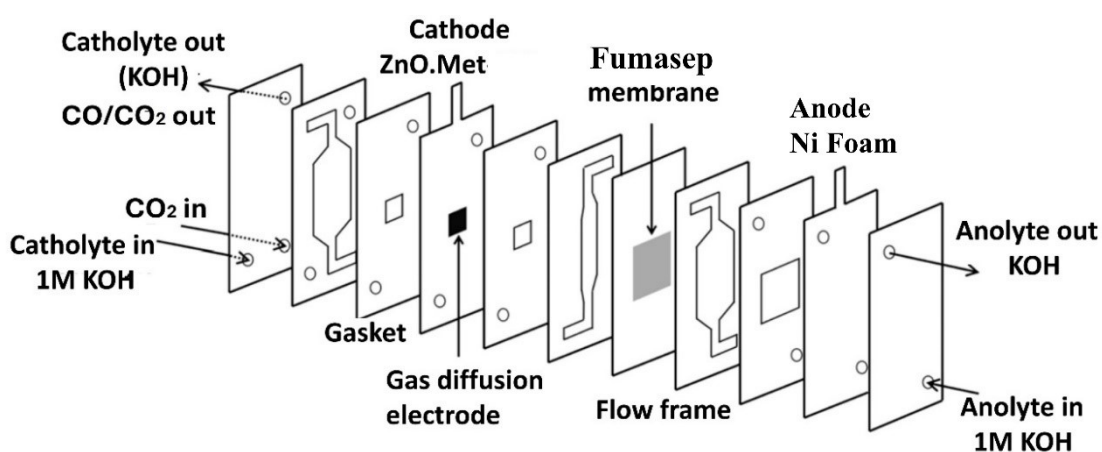

**Figure S1.** Configuration of the commercial flow cell (Micro Flow Cell, Electrocell) with three compartments.

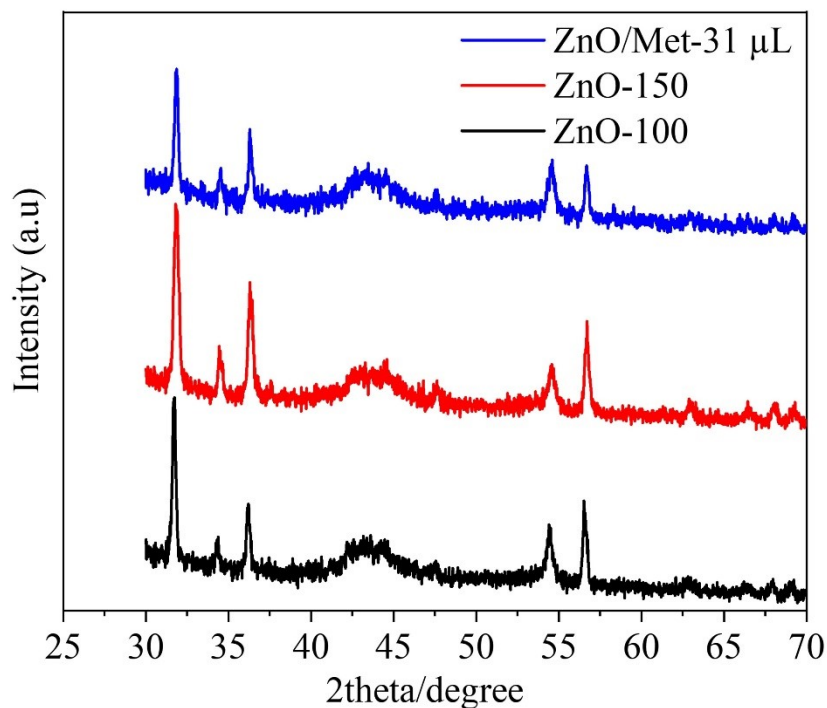

**Figure. S2:** X-ray diffraction (XRD) patterns of ZnO electrodes prepared at different temperatures (100 and 150 °C) and modified with monoethanolamine (ZnO/Met-31 μL).

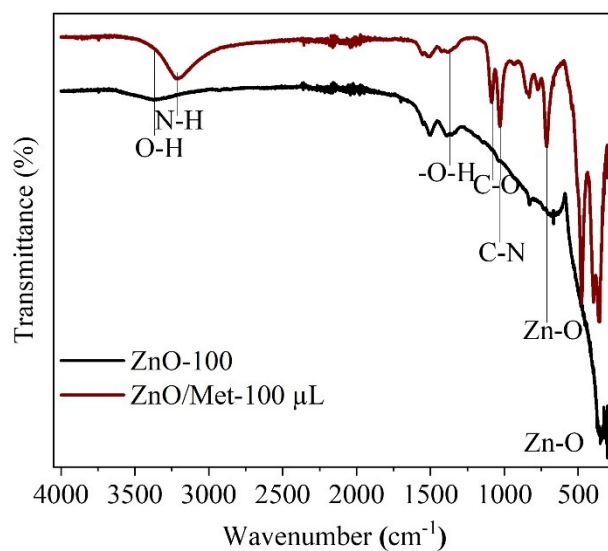

**Figure S3:** FTIR spectra of ZnO-100 and ZnO/Met-100 μL.

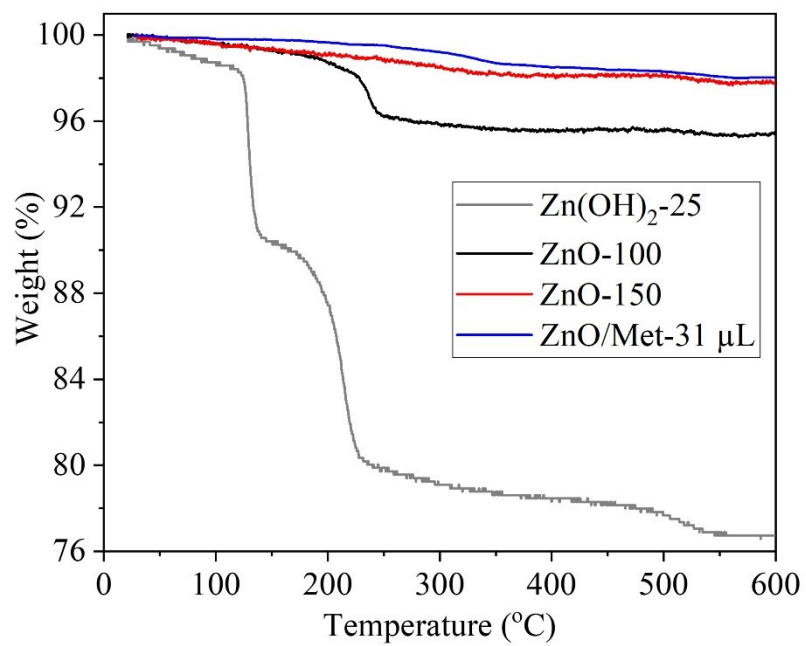

**Figure. S4:** A) Thermogravimetric analysis of the precursor  $\text{Zn}(\text{OH})_2$  and ZnO obtained by hydrothermal treatment at  $100^\circ\text{C}$ ,  $150^\circ\text{C}$ , and ZnO/Met- $31\ \mu\text{L}$ .

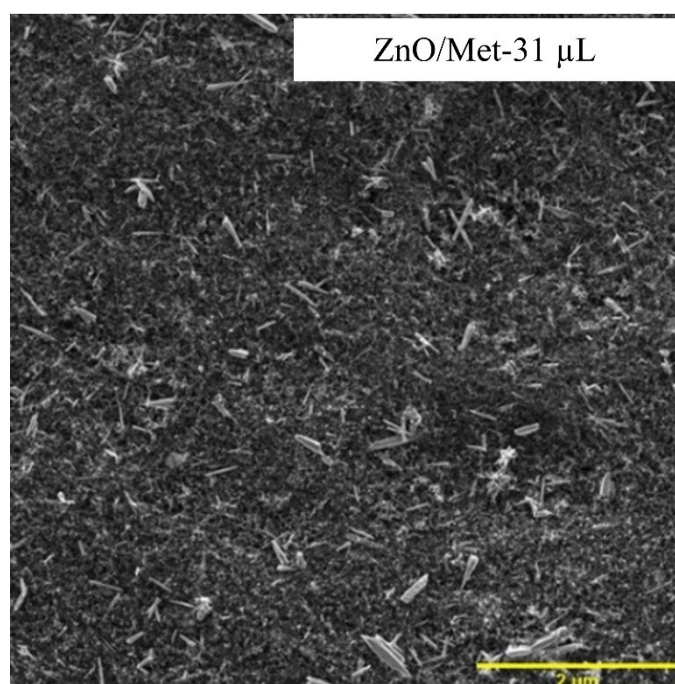

**Figure S5.** SEM image of the surface of the ZnO/Met- $31\ \mu\text{L}$  electrode with 25% CB.

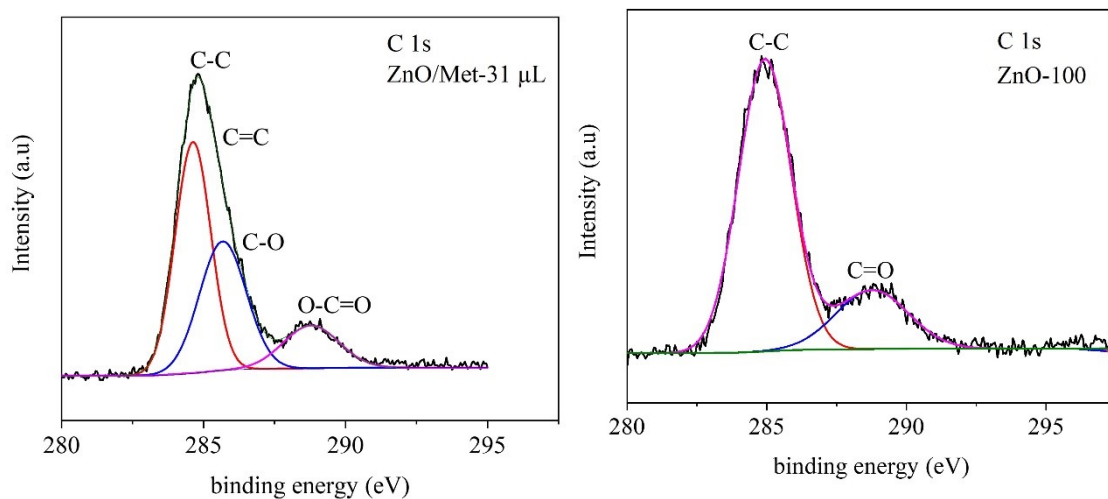

**Figure S6.** High resolution spectra of carbon C1s used to calibrate the binding energies for A) ZnO/Met-31  $\mu\text{L}$  and B) ZnO-100 samples.

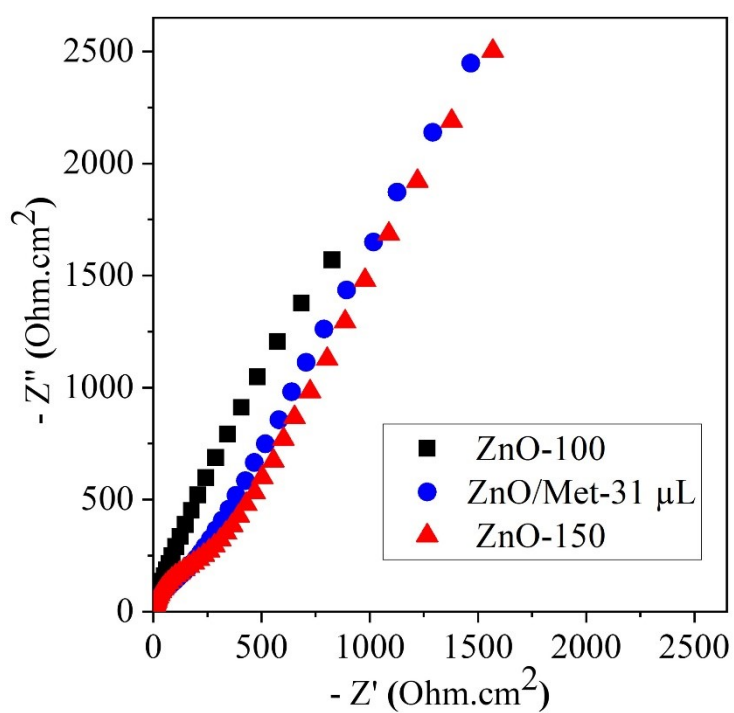

**Figure S7.** Nyquist plot of the impedance (EIS) of GDEs loaded with the catalysts studied under ECR conditions at open circuit potential.

**Table S2:** Comparison of this work with other materials and systems studied for CO production.

| Catalyst         | System    | FE CO (%) | $j$ (mA.cm <sup>-2</sup> ) | E (V)              | Stability | Electrolyte             | Ref. |
|------------------|-----------|-----------|----------------------------|--------------------|-----------|-------------------------|------|
| ZnO              | Flow cell | > 80      | -130                       | -1.2 V vs RHE      | 100 h     | 1 M KOH                 | **   |
| ZnO              | MEA       | 82        | -200                       | -1.2 V vs RHE      | >100 h    | 1 M KOH                 | 1    |
| Zn- foam         | Flow cell | 85        | -200                       | -0.64 V vs RHE     | >10 h     | 1 M KOH                 | 2    |
| Zn               | MEA       | > 90      | -200                       | -3 V               | -         | 1 M KOH                 | 3    |
| Oxide-derived Zn | Flow cell | 90        | -200                       | -0.62 V vs Ag/AgCl | >18 h     | 0.1 M KHCO <sub>3</sub> | 4    |
| OD-Zn            | Flow cell | 80        | -100                       | -0.6 V vs Ag/AgCl  | >10 h     | 2.0 M KHCO <sub>3</sub> | 5    |
| ZnO              | Flow cell | 90        | 140                        | -0.8 V vs RHE      | -         | 1 M KOH                 | 6    |
| ZnS/ZnO          | Flow cell | 92        | 327                        | -0.7 V vs RHE      | 40 h      | 1 M KOH                 | 7    |

\*\* This work

## References

- 1 I. Stamatelos, C. T. Dinh, W. Lehnert and M. Shviro, *ACS Appl Energy Mater*, 2022, **5**, 13928–13938.
- 2 W. Luo, J. Zhang, M. Li and A. Züttel, *ACS Catal*, 2019, **9**, 3783–3791.
- 3 J. Lee, J. Lim, C. W. Roh, H. S. Whang and H. Lee, *Journal of CO2 Utilization*, 2019, **31**, 244–250.
- 4 W. Luo, Q. Zhang, J. Zhang, E. Moioli, K. Zhao and A. Züttel, *Appl Catal B*, DOI:10.1016/j.apcatb.2020.119060.
- 5 J. Zeng, M. Fontana, A. Sacco, D. Sassone and C. F. Pirri, *Catal Today*, 2022, **397–399**, 463–474.
- 6 S. Zhu, X. Ren, X. Li, X. Niu, M. Wang, S. Xu, Z. Wang, Y. Han and Q. Wang, *Catalysts*, DOI:10.3390/catal11050535.
- 7 Y. Song, Y. Wang, J. Shao, K. Ye, Q. Wang and G. Wang, *supporting information Boosting CO 2 Electroreduction via The Construction of A Stable ZnS/ZnO Interface*.
